# Supplementary material for: Astaxanthine attenuates cisplatin ototoxicity in vitro and protects against cisplatin-induced hearing loss in vivo
Source: PubMed Central journal article supplement — Acta Pharm Sin B. 2021 Jul 10;12(1):167–81. doi: 10.1016/j.apsb.2021.07.002 (PMC8800030; doi:10.1016/j.apsb.2021.07.002), 2021-07-10
Supplement: mmc1.pdf [file mmc1.pdf]

**Supporting Information for**

**Original article**

**Astaxanthine attenuates cisplatin ototoxicity *in vitro* and protects against cisplatin-induced hearing loss *in vivo***

**Benyu Nan<sup>a,b</sup>, Zirui Zhao<sup>c</sup>, Kanglun Jiang<sup>a</sup>, Xi Gu<sup>d,\*</sup>, Huawei Li<sup>e,f,g,h,\*</sup>, Xinsheng Huang<sup>a,\*</sup>**

<sup>a</sup>*Department of Otorhinolaryngology-Head and Neck Surgery, Zhongshan Hospital, Fudan University, Shanghai 200030, China*

<sup>b</sup>*Department of Otorhinolaryngology-Head and Neck Surgery, Wenzhou Medical University, Affiliated Hospital 2, Wenzhou 325000, China*

<sup>c</sup>*Department of Otolaryngology, Yueyang Hospital of Integrated Traditional Chinese and Western Medicine, Shanghai University of Traditional Chinese Medicine, Shanghai 200437, China*

<sup>d</sup>*Department of Otolaryngology, the First Affiliated Hospital of Fujian Medical University, Fuzhou 350005, China*

<sup>e</sup>*ENT institute and Department of Otorhinolaryngology, Eye & ENT Hospital, State Key Laboratory of Medical Neurobiology and MOE Frontiers Center for Brain Science, Fudan University, Shanghai 200031, China*

<sup>f</sup>*Institutes of Biomedical Sciences, Fudan University, Shanghai 200032, China*

<sup>g</sup>*NHC Key Laboratory of Hearing Medicine (Fudan University), Shanghai 200031, China*

<sup>h</sup>*The Institutes of Brain Science and the Collaborative Innovation Center for Brain Science, Fudan University, Shanghai 200032, China*

Received 11 March 2021; received in revised form 3 June 2021; accepted 16 June 2021

\*Corresponding authors. Tel.: +86 591 87982117, fax: +86 591 87982117 (Xi Gu); Tel.: +86 21 64377134 669, fax: +86 21 64377151 (Huawei Li); Tel.: +86 21 64041990, fax: +86 21 64041990 (Xinsheng Huang).

E-mail addresses: [harry-xixi@hotmail.com](mailto:harry-xixi@hotmail.com) (Xi Gu); [hwli@shmu.edu.cn](mailto:hwli@shmu.edu.cn) (Huawei Li), [huang.xinsheng@zs-hospital.sh.cn](mailto:huang.xinsheng@zs-hospital.sh.cn) (Xinsheng Huang).

Running title: Astaxanthine attenuates cisplatin ototoxicity and cisplatin-induced hearing loss

**Table S1**

**Table S2**

**Figure S1**

**Figure S2**

**Figure S3**

**Table S1** Primers used for quantitative PCR.

| Name                   | Sequence                      |
|------------------------|-------------------------------|
| Caspase-3 forward      | 5'-GAGCTTGGAACGGTACGCTA-3'    |
| Caspase-3 reverse      | 5'-GCGAGATGACATTCCAGTGC-3'    |
| Caspase-8 forward      | 5'-TGCTTGGACTACATCCCACAC-3'   |
| Caspase-8 reverse      | 5'-TGCAGTCTAGGAAGTTGACCA-3'   |
| Caspase-9 forward      | 5'-TCCTGGTACATCGAGACCTTG-3'   |
| Caspase-9 reverse      | 5'-AAGTCCCTTTTCGCAGAAACAG-3'  |
| <i>Bax</i> forward     | 5'-AAACTGGTGCTCAAGGCC-3'      |
| <i>Bax</i> reverse     | 5'-CTTGGATCCAGACAAGCAGC-3'    |
| <i>Fadd</i> forward    | 5'-CTGCGCCGACACGATCTAC-3'     |
| <i>Fadd</i> reverse    | 5'-CGGGCCAGTCTTTTCCAGT-3'     |
| <i>Nrf2</i> forward    | 5'-TCCATTCCC GAATTACAGTGTC-3' |
| <i>Nrf2</i> reverse    | 5'-TCCAGCGAGGAGATCGATGA-3'    |
| <i>Nqo1</i> forward    | 5'-GGTAGCGGCTCCATGTACTC-3'    |
| <i>Nqo1</i> reverse    | 5'-CGCAGGATGCCACTCTGAAT-3'    |
| <i>Hmox-1</i> forward  | 5'-CCAGAGAAGGCTTTAAGCTGGT-3'  |
| <i>Hmox-1</i> reverse  | 5'-CACCTCGTGGAGACGCTTTA-3'    |
| $\beta$ -Actin forward | 5'-CACTGTCGAGTCGCGTCC-3'      |
| $\beta$ -Actin reverse | 5'-TCATCCATGGCGAACTGGTG-3'    |

**Table S2** List of interaction energy of molecular compounds docked with the KEAP1-NRF2 protein.

| Molecular compounds | CDOCKER_INTERACTION_ENERGY (Kcal/mol) |
|---------------------|---------------------------------------|
| Allopurinol         | 19.7815                               |
| Lipoic acid         | 38.5661                               |
| Acetylcysteine      | 23.3023                               |
| Salicylic acid      | 25.8723                               |
| Thiosulfuric acid   | 7.93491                               |
| Thiourea            | 8.47726                               |
| Tiopronin           | 26.3163                               |
| Amifostine          | 39.2029                               |
| Astaxanthine        | 70.6665                               |
| Dexamethasone       | 51.7312                               |
| Ditiocarb           | 16.629                                |
| Ebselen             | 27.2633                               |
| Epigallocatechin    | 63.0877                               |
| Erdosteine          | 43.123                                |
| Glutathione         | 52.3212                               |

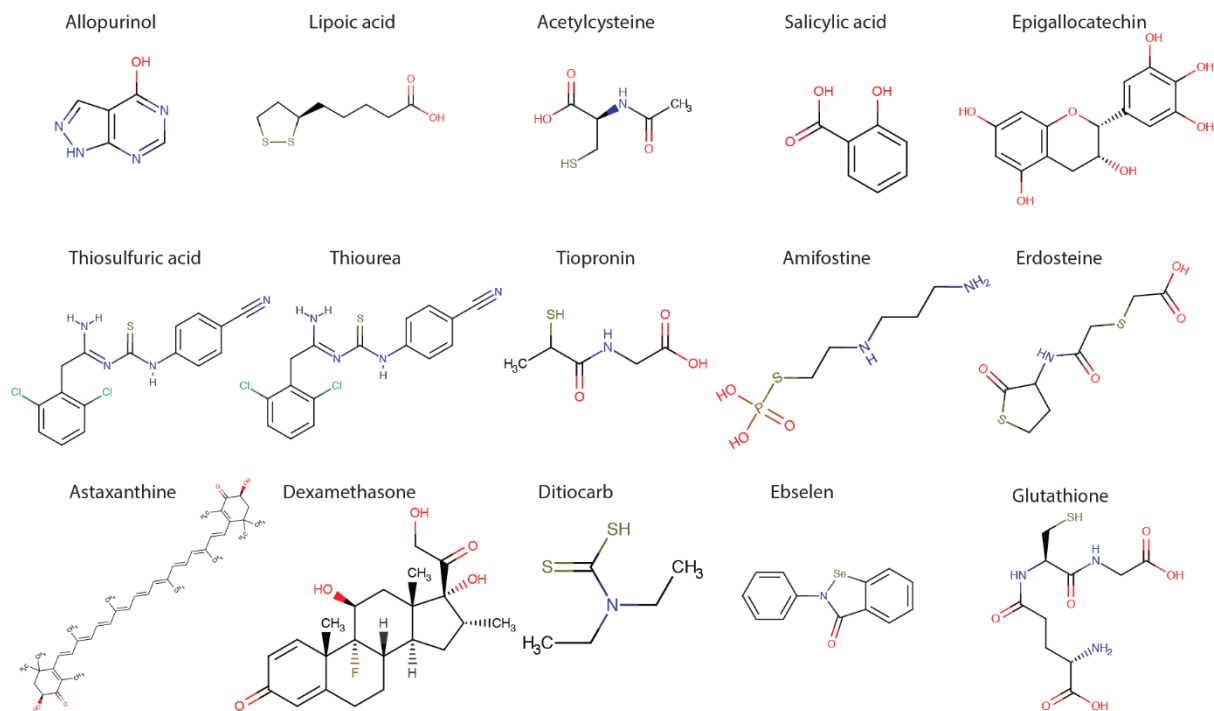

**Figure S1** 2D structures of molecular compounds from drug bank.

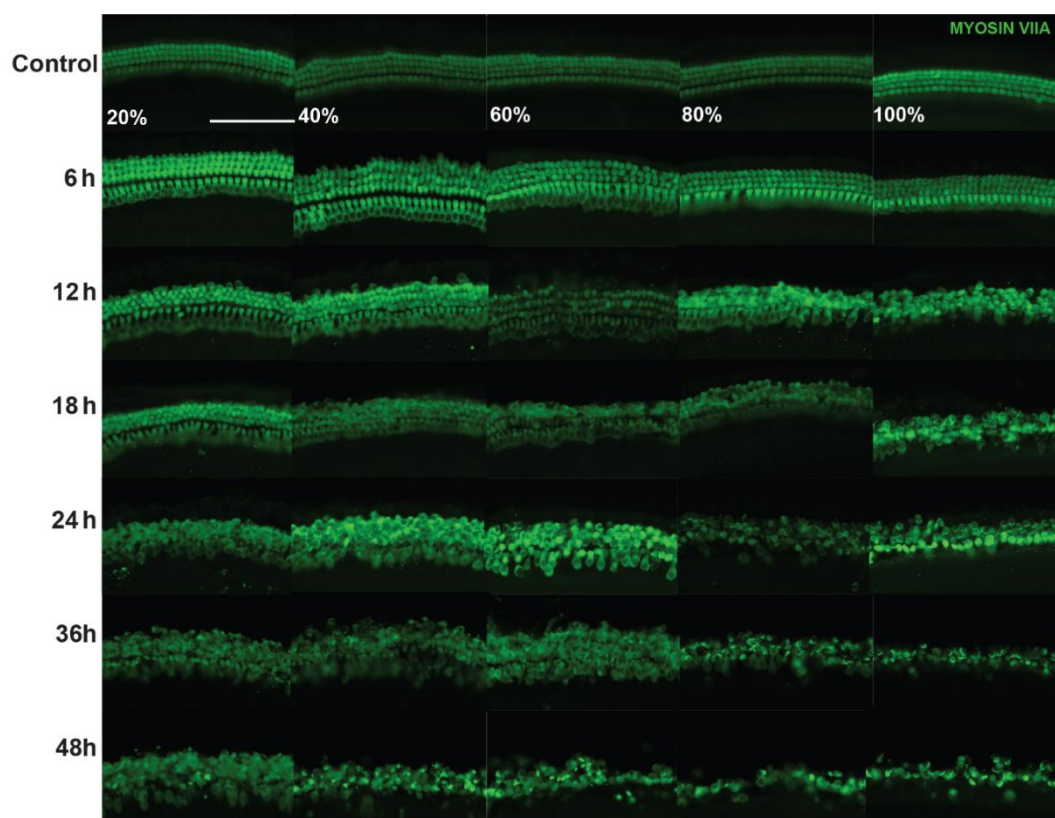

**Figure S2** Representative immunofluorescence image of HCs labelled with Myosin VIIA (green) in the cochlear explants treated with 50  $\mu\text{mol/L}$  cisplatin for 6, 12, 18, 24, 36, and 48 h. Scale bar = 100  $\mu\text{m}$ . The distance from the apex is presented as 20%, 40%, 60%, 80% and 100%. HC, hair cell.

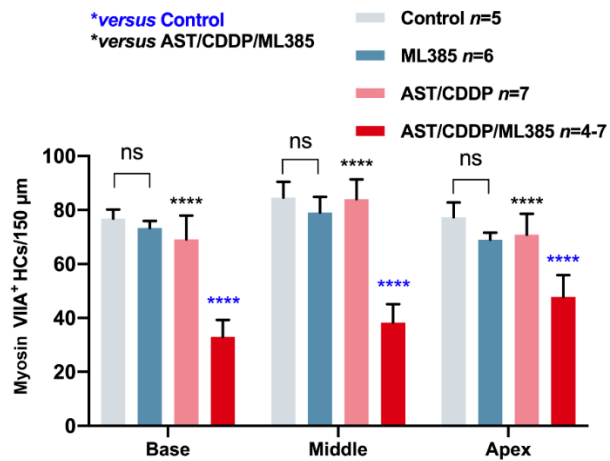

**Figure S3** Quantitative analysis of the numbers of survival HCs stained with Myosin VIIA per 200  $\mu\text{m}$  in the various cochlear regions following the different treatments. The data is presented as means  $\pm$  SD, \*\*\*\* $P < 0.0001$  compared with AST/CDDP/ML385 by two-way ANOVA with Bonferroni correction. ns: not significant. AST, astaxanthine; CDDP, cisplatin; Base, basal turn; Middle, middle turn; Apex, apical turn.
